# Supplementary material for: Surgical versus clinical staging prior to primary chemoradiation in patients with cervical cancer FIGO stages IIB–IVA: oncologic results of a prospective randomized international multicenter (Uterus-11) intergroup study
Source: PubMed Central journal article supplement — Int J Gynecol Cancer. 2020 Dec 4;30(12):1855–61. doi: 10.1136/ijgc-2020-001973 (PMC7788482; doi:10.1136/ijgc-2020-001973), 2020-12-04
Supplement: ijgc-2020-001973supp003.pdf [file ijgc-2020-001973supp003.pdf]

# INTERNATIONAL JOURNAL OF GYNECOLOGICAL CANCER

## Surgical versus Clinical Staging prior to primary Chemoradiation in Patients with Cervical Cancer FIGO Stages IIB-IVA: Oncologic Results of a Prospective Randomized International Multicentre (Uterus-11) Intergroup Study

Marnitz S, Tsunoda A, Martus P, Vieira MA, Affonso Junior RJ, Nunes JS, Budach V, Hertel H, Mustea A, Sehouli J, Scharf JP, Ulrich U, Ebert A, Piwonski I, Köhler C

### Objective

To evaluate the impact of pre-treatment surgical staging on disease-free survival (DFS) in patients with locally advanced cervical cancer

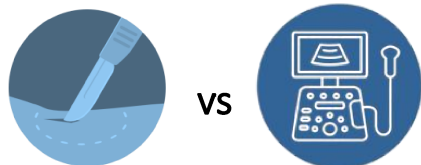

VS

Uterus-11-trial is the only completed randomized trial comparing surgical (laparoscopic) versus clinical staging prior to primary chemoradiation

Corresponding author: Simone Marnitz M.D.

Department of Radiation Oncology, CyberKnife and Radiotherapy, University of Cologne, Medical Faculty, Germany

Mail: simone.marnitz-schulze@uk-koeln.de

Phone: #49 221 47884764

### UTERUS-11 Study

#### Patient selection

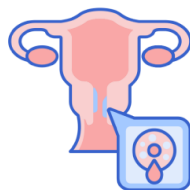

Cervical cancer (squamous-cell carcinoma, adenocarcinoma or adenosquamous cancer)  
FIGO 2009 stage IIB-IVA

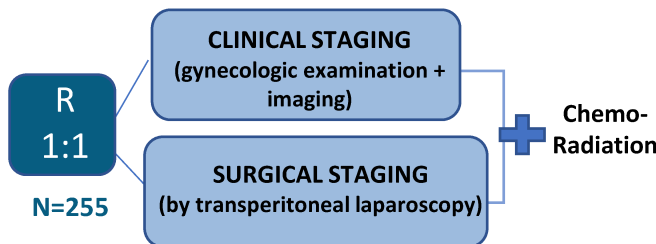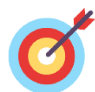

**PRIMARY ENDPOINT:**  
disease-free survival (DFS)

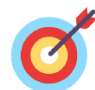

**SECONDARY ENDPOINT:**  
overall survival (OS)

### Highlights

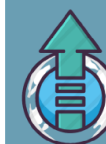

Laparoscopic staging:

**33% of upstaging**

in patients with locally advanced cervical cancer

Laparoscopic staging was safe and did not delay primary chemoradiation

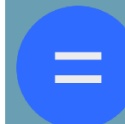

**No difference  
in DFS** (p=0.084)

The surgical staging was superior to clinical staging in terms of DFS just for patients

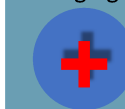

with **stage IIB** (p=0.011)

In a post-hoc analysis - Laparoscopic staging:

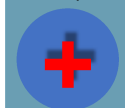

**Cancer-specific survival  
benefit**

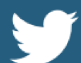

@IJGOnline

Copyright © 2020 BMJ Publishing Group Ltd, International Gynecologic Cancer Society, & European Society of Gynaecological Oncology. All rights reserved.
